# Supplementary material for: Trend of Prevalence of Atrial Fibrillation and use of Oral Anticoagulation Therapy in Patients With Atrial Fibrillation in South Korea (2002–2013)
Source: PubMed Central journal article supplement (PMC5792231; doi:10.2188/jea.je20160149), 2018-02-05
Supplement: je-28-081-s001.pdf [file je-28-081-s001.pdf]

**eTable 1.** Characteristics of study population, 2002–2013

| <b>Characteristics</b> | <b>2002</b><br>(n=575,969) | <b>2003</b><br>(n=585,795) | <b>2004</b><br>(n=595,236) | <b>2005</b><br>(n=604,474) | <b>2006</b><br>(n=605,118) | <b>2007</b><br>(n=623,703) | <b>2008</b><br>(n=618,178) | <b>2009</b><br>(n=626,145) | <b>2010</b><br>(n=637,928) | <b>2011</b><br>(n=649,342) | <b>2012</b><br>(n=660,209) | <b>2013</b><br>(n=670,040) |
|------------------------|----------------------------|----------------------------|----------------------------|----------------------------|----------------------------|----------------------------|----------------------------|----------------------------|----------------------------|----------------------------|----------------------------|----------------------------|
| <b>Age group</b>       |                            |                            |                            |                            |                            |                            |                            |                            |                            |                            |                            |                            |
| 30–39 years            | 187,717<br>(32.59)         | 185,841<br>(31.72)         | 184,670<br>(31.02)         | 182,248<br>(30.15)         | 177,226<br>(29.29)         | 177,460<br>(28.45)         | 169,060<br>(27.35)         | 165,369<br>(26.41)         | 162,987<br>(25.55)         | 160,897<br>(24.78)         | 158,860<br>(24.06)         | 155,953<br>(23.28)         |
| 40–49 years            | 168,327<br>(29.23)         | 170,973<br>(29.19)         | 173,700<br>(29.18)         | 174,979<br>(28.95)         | 173,915<br>(28.74)         | 177,551<br>(28.47)         | 176,281<br>(28.52)         | 176,397<br>(28.17)         | 175,856<br>(27.57)         | 175,264<br>(26.99)         | 175,171<br>(26.53)         | 176,668<br>(26.37)         |
| 50–59 years            | 97,116<br>(16.86)          | 98,979<br>(16.90)          | 103,045<br>(17.31)         | 110,350<br>(18.26)         | 114,722<br>(18.96)         | 121,765<br>(19.52)         | 124,410<br>(20.13)         | 131,086<br>(20.94)         | 139,950<br>(21.94)         | 149,533<br>(23.03)         | 154,715<br>(23.43)         | 159,483<br>(23.80)         |
| 60–69 years            | 75,522<br>(13.11)          | 77,791<br>(13.28)          | 78,573<br>(13.20)          | 78,236<br>(12.94)          | 77,926<br>(12.88)          | 81,402<br>(13.05)          | 81,543<br>(13.19)          | 82,541<br>(13.18)          | 84,360<br>(13.22)          | 84,453<br>(13.01)          | 86,658<br>(13.13)          | 89,336<br>(13.33)          |
| 70–79 years            | 35,064<br>(6.09)           | 37,609<br>(6.42)           | 40,132<br>(6.74)           | 42,755<br>(7.07)           | 44,884<br>(7.42)           | 47,896<br>(7.68)           | 48,774<br>(7.89)           | 51,351<br>(8.20)           | 53,869<br>(8.44)           | 56,996<br>(8.78)           | 60,886<br>(9.22)           | 63,076<br>(9.41)           |
| ≥80 years              | 12,223<br>(2.12)           | 14,602<br>(2.49)           | 15,116<br>(2.54)           | 15,906<br>(2.63)           | 16,445<br>(2.72)           | 17,629<br>(2.83)           | 18,110<br>(2.93)           | 19,401<br>(3.10)           | 20,906<br>(3.28)           | 22,199<br>(3.42)           | 23,919<br>(3.62)           | 25,524<br>(3.81)           |
| <b>Sex</b>             |                            |                            |                            |                            |                            |                            |                            |                            |                            |                            |                            |                            |
| Male                   | 280,535<br>(48.71)         | 285,560<br>(48.75)         | 290,034<br>(48.73)         | 294,556<br>(48.73)         | 294,944<br>(47.74)         | 303,892<br>(48.72)         | 302,199<br>(48.89)         | 306,011<br>(48.87)         | 311,793<br>(48.88)         | 317,315<br>(48.87)         | 322,616<br>(48.87)         | 327,515<br>(48.88)         |
| Female                 | 295,434<br>(51.29)         | 300,235<br>(51.25)         | 305,202<br>(51.27)         | 309,918<br>(51.27)         | 310,174<br>(51.26)         | 319,811<br>(51.28)         | 315,979<br>(51.11)         | 320,134<br>(51.13)         | 326,135<br>(51.12)         | 332,027<br>(51.13)         | 337,533<br>(51.13)         | 342,525<br>(51.12)         |
| <b>AF</b>              |                            |                            |                            |                            |                            |                            |                            |                            |                            |                            |                            |                            |
|                        | 1,533<br>(0.27)            | 2,070<br>(0.35)            | 2,409<br>(0.40)            | 2,740<br>(0.45)            | 2,816<br>(0.47)            | 3,086<br>(0.49)            | 3,361<br>(0.54)            | 3,631<br>(0.58)            | 3,844<br>(0.60)            | 4,446<br>(0.68)            | 4,822<br>(0.73)            | 5,213<br>(0.78)            |
| <b>HF</b>              |                            |                            |                            |                            |                            |                            |                            |                            |                            |                            |                            |                            |
|                        | 7,539<br>(1.31)            | 8,460<br>(1.44)            | 9,026<br>(1.52)            | 9,749<br>(1.61)            | 9,438<br>(1.56)            | 10,135<br>(1.62)           | 10,463<br>(1.69)           | 10,397<br>(1.66)           | 10,504<br>(1.65)           | 10,860<br>(1.67)           | 11,357<br>(1.72)           | 11,948<br>(1.78)           |
| <b>IHD</b>             |                            |                            |                            |                            |                            |                            |                            |                            |                            |                            |                            |                            |
|                        | 16,961<br>(2.94)           | 20,450<br>(3.49)           | 22,737<br>(3.82)           | 25,530<br>(4.22)           | 25,373<br>(4.19)           | 27,766<br>(4.45)           | 29,876<br>(4.83)           | 31,665<br>(5.06)           | 31,971<br>(5.01)           | 32,354<br>(4.98)           | 33,091<br>(5.01)           | 34,305<br>(5.12)           |
| <b>VHD</b>             |                            |                            |                            |                            |                            |                            |                            |                            |                            |                            |                            |                            |
|                        | 1,280<br>(0.22)            | 1,547<br>(0.26)            | 1,603<br>(0.27)            | 1,683<br>(0.28)            | 1,678<br>(0.28)            | 1,724<br>(0.28)            | 1,842<br>(0.30)            | 1,877<br>(0.30)            | 1,878<br>(0.29)            | 2,228<br>(0.34)            | 2,372<br>(0.36)            | 2,338<br>(0.35)            |
| <b>Cardiomyopathy</b>  |                            |                            |                            |                            |                            |                            |                            |                            |                            |                            |                            |                            |
|                        | 498<br>(0.09)              | 597<br>(0.10)              | 546<br>(0.09)              | 601<br>(0.10)              | 576<br>(0.10)              | 648<br>(0.10)              | 693<br>(0.11)              | 724<br>(0.12)              | 738<br>(0.12)              | 875<br>(0.13)              | 1,028<br>(0.16)            | 1,042<br>(0.16)            |
| <b>Hypertension</b>    |                            |                            |                            |                            |                            |                            |                            |                            |                            |                            |                            |                            |
|                        | 68,660<br>(11.92)          | 81,352<br>(13.89)          | 92,454<br>(15.53)          | 102,992<br>(17.04)         | 109,004<br>(18.01)         | 118,084<br>(18.93)         | 129,052<br>(20.88)         | 136,693<br>(21.83)         | 136,998<br>(21.48)         | 152,239<br>(23.45)         | 159,376<br>(24.14)         | 164,901<br>(24.61)         |
| <b>DM</b>              |                            |                            |                            |                            |                            |                            |                            |                            |                            |                            |                            |                            |
|                        | 38,005<br>(6.60)           | 45,068<br>(7.69)           | 49,992<br>(8.40)           | 58,061<br>(9.61)           | 56,452<br>(9.33)           | 60,223<br>(9.66)           | 65,103<br>(10.53)          | 69,363<br>(11.08)          | 70,716<br>(11.09)          | 72,428<br>(11.15)          | 76,410<br>(11.57)          | 81,284<br>(12.13)          |

Data reported as n(%)

AF, atrial fibrillation; IHD, ischemic heart disease; HF, heart failure; DM, diabetes mellitus; VHD, valvular heart disease.

**Table 2.** Weights for age-standardized prevalence, 2015 Korea midyear distribution

| Age group   | Overall | Men   | Women |
|-------------|---------|-------|-------|
| 30–39 years | 0.227   | 0.237 | 0.217 |
| 40–49 years | 0.259   | 0.269 | 0.250 |
| 50–59 years | 0.241   | 0.248 | 0.234 |
| 60–69 years | 0.142   | 0.142 | 0.143 |
| 70–79 years | 0.092   | 0.081 | 0.104 |
| ≥ 80 years  | 0.039   | 0.024 | 0.053 |

**eTable 3-1.** Crude and age-standardized prevalence of comorbidities in overall by with and without AF during 2002–2013

| Comorbidities         | Year        |             |             |             |             |             |             |             |             |             |             |             | P for trend |
|-----------------------|-------------|-------------|-------------|-------------|-------------|-------------|-------------|-------------|-------------|-------------|-------------|-------------|-------------|
|                       | 2002        | 2003        | 2004        | 2005        | 2006        | 2007        | 2008        | 2009        | 2010        | 2011        | 2012        | 2013        |             |
| <b>HF</b>             |             |             |             |             |             |             |             |             |             |             |             |             |             |
| With AF               | 42.9 / 37.6 | 43.6 / 38.2 | 41.5 / 35.7 | 39.7 / 33.4 | 39.4 / 33.5 | 36.1 / 29.9 | 33.4 / 27.7 | 32.3 / 27.5 | 34.0 / 30.3 | 26.7 / 22.7 | 28.3 / 24.7 | 28.9 / 25.6 | <0.001      |
| Without AF            | 1.2 / 0.7   | 1.3 / 0.7   | 1.4 / 0.8   | 1.4 / 0.8   | 1.4 / 0.8   | 1.5 / 0.8   | 1.5 / 0.9   | 1.5 / 0.9   | 1.5 / 0.9   | 1.5 / 0.9   | 1.5 / 0.9   | 1.6 / 1.0   | <0.001      |
| <b>IHD</b>            |             |             |             |             |             |             |             |             |             |             |             |             |             |
| With AF               | 47.0 / 44.7 | 44.5 / 41.1 | 44.1 / 40.6 | 44.7 / 41.4 | 43.0 / 40.7 | 44.2 / 40.6 | 40.9 / 38.4 | 42.5 / 39.8 | 42.5 / 39.7 | 38.3 / 35.7 | 38.5 / 35.6 | 37.5 / 34.9 | <0.001      |
| Without AF            | 2.8 / 1.9   | 3.3 / 2.2   | 3.7 / 2.4   | 4.0 / 2.7   | 4.0 / 2.7   | 4.3 / 2.9   | 4.6 / 3.2   | 4.8 / 3.3   | 4.8 / 3.3   | 4.8 / 3.3   | 4.8 / 3.3   | 4.9 / 3.4   | <0.001      |
| <b>VHD</b>            |             |             |             |             |             |             |             |             |             |             |             |             |             |
| With AF               | 18.2 / 19.5 | 20.1 / 21.8 | 18.4 / 19.8 | 17.3 / 18.9 | 16.3 / 17.9 | 14.4 / 15.0 | 14.0 / 14.8 | 13.7 / 14.7 | 12.9 / 13.3 | 12.0 / 12.3 | 12.8 / 13.1 | 12.1 / 12.7 | <0.001      |
| Without AF            | 0.2 / 0.1   | 0.2 / 0.1   | 0.2 / 0.1   | 0.2 / 0.1   | 0.2 / 0.1   | 0.2 / 0.1   | 0.2 / 0.2   | 0.2 / 0.2   | 0.2 / 0.2   | 0.3 / 0.2   | 0.3 / 0.2   | 0.3 / 0.2   | <0.001      |
| <b>Cardiomyopathy</b> |             |             |             |             |             |             |             |             |             |             |             |             |             |
| With AF               | 4.8 / 5.0   | 5.9 / 5.8   | 3.9 / 4.3   | 4.1 / 4.7   | 4.3 / 4.9   | 3.7 / 3.9   | 4.3 / 4.3   | 3.9 / 4.2   | 3.9 / 4.3   | 4.3 / 4.6   | 4.2 / 4.6   | 4.4 / 4.8   | 0.111       |
| Without AF            | 0.1 / 0.0   | 0.1 / 0.1   | 0.1 / 0.1   | 0.1 / 0.1   | 0.1 / 0.1   | 0.1 / 0.1   | 0.1 / 0.1   | 0.1 / 0.1   | 0.1 / 0.1   | 0.1 / 0.1   | 0.1 / 0.1   | 0.1 / 0.1   | <0.001      |
| <b>Hypertension</b>   |             |             |             |             |             |             |             |             |             |             |             |             |             |
| With AF               | 76.9 / 72.6 | 77.6 / 72.6 | 78.7 / 73.2 | 80.6 / 76.0 | 81.6 / 76.9 | 79.5 / 75.1 | 79.4 / 74.9 | 80.6 / 75.9 | 81.0 / 76.4 | 79.0 / 73.9 | 82.9 / 78.2 | 84.5 / 80.9 | <0.001      |
| Without AF            | 11.7 / 7.6  | 13.7 / 8.9  | 15.3 / 10.1 | 16.7 / 11.2 | 17.7 / 12.1 | 18.6 / 12.9 | 20.6 / 14.3 | 21.5 / 15.3 | 21.1 / 15.4 | 23.1 / 16.9 | 23.7 / 17.6 | 24.1 / 18.2 | <0.001      |
| <b>DM</b>             |             |             |             |             |             |             |             |             |             |             |             |             |             |
| With AF               | 27.7 / 25.4 | 31.9 / 29.7 | 33.1 / 29.5 | 34.7 / 30.8 | 34.4 / 31.6 | 37.1 / 33.8 | 37.2 / 34.2 | 39.0 / 36.1 | 39.5 / 36.6 | 37.6 / 34.7 | 38.4 / 35.5 | 40.0 / 36.9 | <0.001      |
| Without AF            | 6.5 / 4.7   | 7.6 / 5.5   | 8.3 / 6.0   | 9.5 / 6.9   | 9.2 / 6.7   | 9.5 / 6.9   | 10.4 / 7.6  | 10.9 / 8.1  | 10.9 / 8.3  | 11.0 / 8.3  | 11.4 / 8.8  | 11.9 / 9.3  | <0.001      |

Data reported as crude prevalence, % / age-standardized prevalence, %

DM, diabetes mellitus; HF, heart failure; IHD, ischemic heart disease; VHD, valvular heart disease.

P-value obtained by Cochran-Armitage trend test

**eTable 3-2.** Crude and age-standardized prevalence of comorbidities in men by with and without AF during 2002–2013

| Comorbidities         | Year        |             |             |             |             |             |             |             |             |             |             |             | P for trend |
|-----------------------|-------------|-------------|-------------|-------------|-------------|-------------|-------------|-------------|-------------|-------------|-------------|-------------|-------------|
|                       | 2002        | 2003        | 2004        | 2005        | 2006        | 2007        | 2008        | 2009        | 2010        | 2011        | 2012        | 2013        |             |
| <b>HF</b>             |             |             |             |             |             |             |             |             |             |             |             |             |             |
| With AF               | 38.7 / 33.5 | 39.0 / 34.4 | 37.0 / 33.2 | 34.8 / 30.3 | 33.4 / 29.2 | 31.6 / 26.5 | 29.4 / 24.0 | 28.8 / 24.7 | 30.4 / 27.0 | 22.4 / 19.0 | 24.5 / 21.3 | 24.9 / 21.8 | <0.001      |
| Without AF            | 0.8 / 0.5   | 0.9 / 0.5   | 1.0 / 0.6   | 1.1 / 0.6   | 1.1 / 0.6   | 1.1 / 0.7   | 1.2 / 0.7   | 1.2 / 0.7   | 1.2 / 0.7   | 1.2 / 0.8   | 1.3 / 0.8   | 1.4 / 0.9   | <0.001      |
| <b>IHD</b>            |             |             |             |             |             |             |             |             |             |             |             |             |             |
| With AF               | 46.6 / 45.5 | 43.1 / 41.6 | 44.6 / 42.0 | 45.3 / 42.4 | 43.6 / 42.3 | 45.0 / 41.5 | 41.3 / 39.0 | 43.3 / 40.7 | 43.7 / 41.1 | 38.6 / 36.1 | 39.1 / 36.3 | 37.5 / 34.7 | <0.001      |
| Without AF            | 2.7 / 1.8   | 3.2 / 2.2   | 3.6 / 2.4   | 4.0 / 2.7   | 4.1 / 2.8   | 4.3 / 2.9   | 4.7 / 3.2   | 4.9 / 3.4   | 5.0 / 3.5   | 4.9 / 3.4   | 4.9 / 3.5   | 5.0 / 3.6   | <0.001      |
| <b>VHD</b>            |             |             |             |             |             |             |             |             |             |             |             |             |             |
| With AF               | 15.1 / 15.5 | 16.1 / 17.9 | 14.5 / 15.5 | 13.4 / 14.7 | 12.3 / 14.4 | 10.7 / 11.3 | 9.7 / 10.4  | 10.0 / 10.6 | 10.0 / 9.5  | 8.9 / 8.7   | 9.7 / 9.7   | 9.1 / 9.3   | <0.001      |
| Without AF            | 0.1 / 0.1   | 0.2 / 0.1   | 0.2 / 0.1   | 0.2 / 0.1   | 0.2 / 0.1   | 0.2 / 0.1   | 0.2 / 0.1   | 0.2 / 0.1   | 0.2 / 0.1   | 0.2 / 0.1   | 0.2 / 0.1   | 0.2 / 0.1   | <0.001      |
| <b>Cardiomyopathy</b> |             |             |             |             |             |             |             |             |             |             |             |             |             |
| With AF               | 5.1 / 6.0   | 6.3 / 6.6   | 4.8 / 5.7   | 4.9 / 6.1   | 5.2 / 6.2   | 5.0 / 5.3   | 5.2 / 5.4   | 4.8 / 5.2   | 4.9 / 5.3   | 5.3 / 5.6   | 5.1 / 5.3   | 5.2 / 5.6   | 0.377       |
| Without AF            | 0.1 / 0.0   | 0.1 / 0.1   | 0.1 / 0.1   | 0.1 / 0.1   | 0.1 / 0.1   | 0.1 / 0.1   | 0.1 / 0.1   | 0.1 / 0.1   | 0.1 / 0.1   | 0.1 / 0.1   | 0.1 / 0.1   | 0.1 / 0.1   | <0.001      |
| <b>Hypertension</b>   |             |             |             |             |             |             |             |             |             |             |             |             |             |
| With AF               | 74.7 / 71.2 | 76.5 / 72.6 | 77.1 / 72.2 | 79.8 / 75.2 | 80.1 / 75.8 | 78.8 / 74.8 | 78.2 / 74.0 | 79.3 / 75.0 | 79.3 / 74.9 | 77.3 / 72.2 | 81.7 / 77.5 | 83.2 / 79.4 | <0.001      |
| Without AF            | 10.1 / 6.6  | 12.1 / 8.0  | 13.8 / 9.3  | 15.4 / 10.6 | 16.6 / 11.6 | 17.6 / 12.5 | 19.2 / 13.9 | 20.3 / 14.9 | 20.5 / 15.4 | 22.2 / 16.8 | 23.0 / 17.7 | 23.7 / 18.5 | <0.001      |
| <b>DM</b>             |             |             |             |             |             |             |             |             |             |             |             |             |             |
| With AF               | 27.3 / 25.8 | 31.0 / 29.5 | 33.2 / 29.5 | 34.9 / 31.0 | 32.4 / 30.2 | 36.9 / 33.1 | 37.3 / 33.9 | 38.3 / 35.2 | 39.9 / 37.1 | 38.2 / 35.6 | 38.1 / 34.7 | 39.4 / 35.8 | <0.001      |
| Without AF            | 6.5 / 4.7   | 7.7 / 5.5   | 8.4 / 6.1   | 9.7 / 7.1   | 9.5 / 7.0   | 9.9 / 7.3   | 10.8 / 8.0  | 11.3 / 8.6  | 11.5 / 8.8  | 11.3 / 8.8  | 11.8 / 9.3  | 12.3 / 9.8  | <0.001      |

Data reported as crude prevalence, % / age-standardized prevalence, %

DM, diabetes mellitus; HF, heart failure; IHD, ischemic heart disease; VHD, valvular heart disease.

P-value obtained by Cochran-Armitage trend test

**eTable 3-3.** Crude and age-standardized prevalence of comorbidities in women by with and without AF during 2002–2013

| Comorbidities         | Year        |             |             |             |             |             |             |             |             |             |             |             | P for trend |
|-----------------------|-------------|-------------|-------------|-------------|-------------|-------------|-------------|-------------|-------------|-------------|-------------|-------------|-------------|
|                       | 2002        | 2003        | 2004        | 2005        | 2006        | 2007        | 2008        | 2009        | 2010        | 2011        | 2012        | 2013        |             |
| <b>HF</b>             |             |             |             |             |             |             |             |             |             |             |             |             |             |
| With AF               | 47.6 / 42.3 | 48.6 / 42.7 | 46.6 / 38.9 | 45.6 / 37.7 | 46.6 / 39.5 | 41.6 / 34.4 | 38.7 / 33.0 | 36.5 / 31.2 | 38.6 / 34.6 | 32.2 / 28.1 | 33.1 / 29.6 | 34.1 / 31.2 | <0.001      |
| Without AF            | 1.5 / 0.9   | 1.6 / 0.9   | 1.7 / 0.9   | 1.7 / 1.0   | 1.7 / 0.9   | 1.8 / 1.0   | 1.9 / 1.1   | 1.8 / 1.0   | 1.7 / 1.0   | 1.8 / 1.0   | 1.8 / 1.1   | 1.8 / 1.1   | <0.001      |
| <b>IHD</b>            |             |             |             |             |             |             |             |             |             |             |             |             |             |
| With AF               | 47.3 / 43.3 | 46.1 / 40.4 | 43.5 / 38.7 | 43.9 / 39.9 | 42.2 / 38.6 | 43.3 / 39.4 | 40.3 / 37.6 | 41.5 / 38.5 | 41.0 / 37.8 | 37.8 / 35.3 | 37.4 / 34.6 | 41.0 / 35.1 | <0.001      |
| Without AF            | 3.0 / 2.0   | 3.5 / 2.3   | 3.7 / 2.5   | 4.1 / 2.7   | 4.0 / 2.7   | 4.2 / 2.8   | 4.6 / 3.1   | 4.8 / 3.2   | 4.6 / 3.2   | 4.6 / 3.2   | 4.6 / 3.2   | 4.7 / 3.3   | <0.001      |
| <b>VHD</b>            |             |             |             |             |             |             |             |             |             |             |             |             |             |
| With AF               | 21.6 / 24.1 | 24.5 / 26.5 | 22.8 / 25.4 | 22.0 / 24.6 | 21.1 / 22.8 | 19.0 / 20.0 | 19.7 / 21.0 | 18.3 / 20.2 | 16.6 / 18.5 | 15.8 / 17.3 | 16.6 / 17.9 | 16.1 / 17.7 | <0.001      |
| Without AF            | 0.2 / 0.1   | 0.2 / 0.2   | 0.2 / 0.2   | 0.3 / 0.2   | 0.2 / 0.2   | 0.3 / 0.2   | 0.3 / 0.2   | 0.3 / 0.2   | 0.3 / 0.2   | 0.3 / 0.2   | 0.3 / 0.2   | 0.3 / 0.2   | <0.001      |
| <b>Cardiomyopathy</b> |             |             |             |             |             |             |             |             |             |             |             |             |             |
| With AF               | 4.4 / 3.9   | 5.5 / 5.0   | 2.8 / 2.5   | 3.1 / 2.9   | 3.2 / 3.1   | 2.1 / 2.1   | 3.0 / 2.8   | 2.9 / 2.9   | 2.6 / 2.8   | 3.0 / 3.1   | 3.1 / 3.5   | 3.3 / 3.6   | 0.047       |
| Without AF            | 0.1 / 0.1   | 0.1 / 0.1   | 0.1 / 0.0   | 0.1 / 0.1   | 0.1 / 0.0   | 0.1 / 0.1   | 0.1 / 0.1   | 0.1 / 0.1   | 0.1 / 0.1   | 0.1 / 0.1   | 0.1 / 0.1   | 0.1 / 0.1   | <0.001      |
| <b>Hypertension</b>   |             |             |             |             |             |             |             |             |             |             |             |             |             |
| With AF               | 79.3 / 74.2 | 78.8 / 72.6 | 80.5 / 74.5 | 81.5 / 77.1 | 83.4 / 78.3 | 80.4 / 75.6 | 81.0 / 76.1 | 82.2 / 77.2 | 83.1 / 78.3 | 81.2 / 76.3 | 84.4 / 79.2 | 86.1 / 83.0 | <0.001      |
| Without AF            | 13.3 / 8.7  | 15.2 / 9.9  | 16.7 / 11.0 | 18.0 / 11.9 | 18.8 / 12.6 | 19.6 / 13.3 | 21.8 / 14.8 | 22.6 / 15.6 | 21.7 / 15.4 | 23.9 / 16.9 | 24.3 / 17.4 | 24.6 / 17.8 | <0.001      |
| <b>DM</b>             |             |             |             |             |             |             |             |             |             |             |             |             |             |
| With AF               | 28.0 / 25.0 | 33.0 / 29.9 | 32.9 / 29.6 | 34.4 / 30.4 | 36.8 / 33.5 | 37.4 / 34.7 | 37.2 / 34.6 | 39.8 / 37.2 | 39.0 / 36.0 | 36.9 / 33.4 | 38.8 / 36.6 | 40.8 / 38.4 | <0.001      |
| Without AF            | 6.6 / 4.7   | 7.6 / 5.4   | 8.2 / 5.8   | 9.3 / 6.7   | 8.9 / 6.3   | 9.1 / 6.5   | 10.0 / 7.1  | 10.5 / 7.6  | 10.4 / 7.7  | 10.7 / 7.9  | 11.0 / 8.2  | 11.5 / 8.8  | <0.001      |

Data reported as n(%)

DM, diabetes mellitus; HF, heart failure; IHD, ischemic heart disease; VHD, valvular heart disease.

P-value obtained by Cochran-Armitage trend test

**eTable 4.** CHADS<sub>2</sub> and CHA<sub>2</sub>DS<sub>2</sub>-VASc score and oral anticoagulant therapy among AF patients during 2002–2013

| Characteristics                                 | 2002<br>(n=1,533) | 2003<br>(n=2,070) | 2004<br>(n=2,409) | 2005<br>(n=2,740) | 2006<br>(n=2,816) | 2007<br>(n=3,086) | 2008<br>(n=3,361) | 2009<br>(n=3,631) | 2010<br>(n=3,844) | 2011<br>(n=4,446) | 2012<br>(n=4,822) | 2013<br>(n=5,213) |
|-------------------------------------------------|-------------------|-------------------|-------------------|-------------------|-------------------|-------------------|-------------------|-------------------|-------------------|-------------------|-------------------|-------------------|
| <b>CHADS<sub>2</sub> score</b>                  |                   |                   |                   |                   |                   |                   |                   |                   |                   |                   |                   |                   |
| 0                                               | 194 (12.7)        | 239 (11.6)        | 255 (10.6)        | 267 (9.7)         | 253 (9.0)         | 307 (10.0)        | 333 (9.9)         | 352 (9.7)         | 334 (8.7)         | 452 (10.2)        | 395 (8.2)         | 365 (7.0)         |
| 1                                               | 387 (25.2)        | 501 (24.2)        | 598 (24.8)        | 710 (25.9)        | 720 (25.6)        | 741 (24.0)        | 804 (23.9)        | 799 (22.0)        | 818 (21.3)        | 1,013 (22.8)      | 1,097 (22.8)      | 1,135 (21.8)      |
| 2                                               | 450 (29.4)        | 598 (28.9)        | 618 (25.7)        | 698 (25.5)        | 744 (26.4)        | 793 (25.7)        | 823 (24.5)        | 929 (25.6)        | 1,010 (26.3)      | 1,108 (24.9)      | 1,226 (25.4)      | 1,328 (25.5)      |
| 3                                               | 282 (18.4)        | 372 (18.0)        | 481 (20.0)        | 530 (19.3)        | 533 (18.9)        | 590 (19.1)        | 669 (19.9)        | 725 (20.0)        | 776 (20.2)        | 843 (19.0)        | 958 (19.9)        | 1,034 (19.8)      |
| 4                                               | 135 (8.8)         | 208 (10.1)        | 274 (11.4)        | 285 (10.4)        | 317 (11.3)        | 374 (12.1)        | 422 (12.6)        | 487 (13.4)        | 523 (13.6)        | 573 (12.9)        | 654 (13.6)        | 746 (14.3)        |
| 5                                               | 68 (4.4)          | 127 (6.1)         | 147 (6.1)         | 204 (7.5)         | 200 (7.1)         | 218 (7.1)         | 240 (7.1)         | 251 (6.9)         | 297 (7.7)         | 347 (7.8)         | 363 (7.5)         | 452 (8.7)         |
| 6                                               | 17 (1.1)          | 25 (1.2)          | 36 (1.5)          | 46 (1.7)          | 49 (1.7)          | 63 (2.0)          | 70 (2.1)          | 88 (2.4)          | 86 (2.2)          | 110 (2.5)         | 129 (2.7)         | 153 (2.9)         |
| Mean (SD)                                       | 2.03 (1.37)       | 2.14 (1.42)       | 2.21 (1.44)       | 2.24 (1.46)       | 2.26 (1.45)       | 2.29 (1.48)       | 2.31 (1.49)       | 2.36 (1.49)       | 2.41 (1.48)       | 2.35 (1.52)       | 2.41 (1.49)       | 2.50 (1.50)       |
| <b>CHA<sub>2</sub>DS<sub>2</sub>-VASc score</b> |                   |                   |                   |                   |                   |                   |                   |                   |                   |                   |                   |                   |
| 0                                               | 75 (4.9)          | 90 (4.4)          | 100 (4.2)         | 123 (4.5)         | 111 (3.9)         | 115 (3.7)         | 139 (4.1)         | 147 (4.1)         | 146 (3.8)         | 203 (4.6)         | 172 (3.6)         | 168 (3.2)         |
| 1                                               | 220 (14.4)        | 283 (13.7)        | 327 (13.6)        | 367 (13.4)        | 377 (13.4)        | 410 (13.3)        | 423 (12.6)        | 412 (11.4)        | 417 (10.9)        | 531 (11.9)        | 554 (11.5)        | 559 (10.7)        |
| 2                                               | 315 (20.6)        | 420 (20.3)        | 467 (19.4)        | 532 (19.4)        | 519 (18.4)        | 554 (18.0)        | 616 (18.3)        | 625 (17.2)        | 631 (16.4)        | 715 (16.1)        | 766 (15.9)        | 793 (15.2)        |
| 3                                               | 331 (21.6)        | 444 (21.5)        | 450 (18.7)        | 511 (18.7)        | 547 (19.4)        | 557 (18.1)        | 596 (17.7)        | 672 (18.5)        | 709 (18.4)        | 820 (18.4)        | 886 (18.4)        | 963 (18.5)        |
| 4                                               | 275 (17.9)        | 314 (15.2)        | 415 (17.2)        | 427 (15.6)        | 477 (16.9)        | 569 (18.4)        | 589 (17.5)        | 655 (18)          | 696 (18.1)        | 775 (17.4)        | 872 (18.1)        | 944 (18.1)        |
| 5                                               | 165 (10.8)        | 259 (12.5)        | 321 (13.3)        | 392 (14.3)        | 363 (12.9)        | 404 (13.1)        | 469 (14.0)        | 499 (13.7)        | 582 (15.1)        | 616 (13.9)        | 724 (15.0)        | 805 (15.4)        |
| 6                                               | 90 (5.9)          | 152 (7.3)         | 196 (8.1)         | 208 (7.6)         | 254 (9.0)         | 270 (8.8)         | 304 (9.0)         | 360 (9.9)         | 383 (10.0)        | 456 (10.3)        | 494 (10.2)        | 516 (9.9)         |
| 7                                               | 41 (2.7)          | 86 (4.2)          | 91 (3.8)          | 126 (4.6)         | 116 (4.1)         | 152 (4.9)         | 155 (4.6)         | 180 (5.0)         | 202 (5.3)         | 224 (5.0)         | 233 (4.8)         | 343 (6.6)         |
| 8                                               | 19 (1.2)          | 20 (1.0)          | 36 (1.5)          | 45 (1.6)          | 44 (1.6)          | 49 (1.6)          | 63 (1.9)          | 67 (1.9)          | 69 (1.8)          | 97 (2.2)          | 107 (2.2)         | 113 (2.2)         |
| 9                                               | 2 (0.1)           | 2 (0.1)           | 6 (0.3)           | 9 (0.3)           | 8 (0.3)           | 6 (0.2)           | 7 (0.2)           | 14 (0.4)          | 9 (0.2)           | 9 (0.2)           | 14 (0.3)          | 9 (0.2)           |
| Mean (SD)                                       | 3.11 (1.77)       | 3.24 (1.83)       | 3.33 (1.87)       | 3.36 (1.92)       | 3.39 (1.89)       | 3.44 (1.90)       | 3.46 (1.92)       | 3.55 (1.93)       | 3.60 (1.91)       | 3.55 (1.96)       | 3.61 (1.92)       | 3.71 (1.93)       |
| <b>OAC therapy</b>                              | 421 (27.5)        | 606 (29.3)        | 749 (31.1)        | 882 (32.2)        | 955 (33.9)        | 1017 (33.0)       | 1133 (33.7)       | 1288 (35.5)       | 1331 (34.6)       | 1548 (34.8)       | 1705 (35.4)       | 1929 (37.0)       |

Data reported as n(%)

OAC, oral anticoagulant therapy; SD, standard deviation.

**eTable 5.** Age-specific prevalence of hypertension, DM and IHD by sex and age group among AF patients during 2002-2013

| Comorbidities       | Year       |            |            |            |            |            |            |            |            |            |            |            | P for trend | β (P-value)*   |
|---------------------|------------|------------|------------|------------|------------|------------|------------|------------|------------|------------|------------|------------|-------------|----------------|
|                     | 2002       | 2003       | 2004       | 2005       | 2006       | 2007       | 2008       | 2009       | 2010       | 2011       | 2012       | 2013       |             |                |
| <b>Hypertension</b> |            |            |            |            |            |            |            |            |            |            |            |            |             |                |
| Male                |            |            |            |            |            |            |            |            |            |            |            |            |             |                |
| 30–39 years         | 14 (45.2)  | 23 (51.1)  | 26 (49.1)  | 42 (59.2)  | 30 (49.2)  | 31 (50.0)  | 37 (64.9)  | 25 (52.1)  | 16 (39.0)  | 21 (42.0)  | 26 (46.4)  | 33 (53.2)  | 0.267       | 0.22 (0.767)   |
| 40–49 years         | 60 (66.7)  | 89 (67.4)  | 99 (63.9)  | 108 (67.5) | 106 (68.4) | 97 (64.7)  | 112 (63.3) | 111 (65.3) | 95 (57.9)  | 94 (50.5)  | 131 (63.9) | 132 (68.0) | 0.043       | 3.85 (0.008)   |
| 50–59 years         | 129 (76.3) | 161 (74.9) | 200 (79.1) | 233 (76.4) | 248 (78.7) | 258 (79.9) | 251 (72.3) | 269 (73.5) | 297 (77.5) | 357 (73.6) | 403 (78.6) | 436 (77.4) | 0.468       | 24.58 (<0.001) |
| 60–69 years         | 225 (76.8) | 310 (80.3) | 345 (78.6) | 399 (82.8) | 412 (83.6) | 412 (80.3) | 469 (80.9) | 499 (81.3) | 533 (81.9) | 555 (81.0) | 559 (82.1) | 637 (84.7) | 0.008       | 32.28 (<0.001) |
| 70–79 years         | 134 (79.3) | 187 (80.3) | 238 (81.8) | 319 (87.6) | 343 (85.1) | 413 (82.8) | 458 (82.8) | 495 (84.8) | 536 (83.2) | 635 (81.6) | 784 (86.2) | 886 (88.1) | 0.002       | 62.97 (<0.001) |
| ≥80 years           | 37 (74.0)  | 62 (81.6)  | 83 (87.4)  | 93 (80.9)  | 103 (83.1) | 131 (83.4) | 172 (85.1) | 187 (86.2) | 212 (85.8) | 247 (86.7) | 292 (90.7) | 326 (89.1) | <0.001      | 25.47 (<0.001) |
| Female              |            |            |            |            |            |            |            |            |            |            |            |            |             |                |
| 30–39 years         | 11 (45.8)  | 9 (31.0)   | 13 (37.1)  | 17 (48.6)  | 12 (46.2)  | 10 (31.2)  | 11 (36.7)  | 9 (27.3)   | 8 (25.8)   | 6 (22.2)   | 5 (19.2)   | 7 (29.2)   | 0.005       | −0.64 (0.012)  |
| 40–49 years         | 42 (61.8)  | 42 (53.8)  | 38 (52.8)  | 56 (65.1)  | 39 (54.9)  | 43 (60.6)  | 49 (59.8)  | 46 (53.5)  | 45 (60.0)  | 44 (57.1)  | 37 (48.7)  | 51 (69.9)  | 0.401       | 0.24 (0.633)   |
| 50–59 years         | 88 (70.4)  | 120 (71.4) | 113 (67.3) | 127 (72.2) | 148 (74.4) | 134 (70.9) | 118 (69.4) | 158 (76.7) | 161 (70.0) | 157 (67.7) | 168 (69.1) | 196 (76.9) | 0.269       | 7.39 (<0.001)  |
| 60–69 years         | 205 (83.3) | 259 (82.2) | 307 (87.0) | 288 (83.5) | 294 (85.5) | 315 (81.8) | 341 (81.0) | 343 (81.7) | 359 (84.3) | 342 (77.9) | 372 (82.7) | 383 (80.5) | 0.013       | 13.11 (<0.001) |
| 70–79 years         | 163 (87.2) | 236 (89.4) | 289 (88.1) | 363 (87.9) | 368 (90.2) | 396 (85.9) | 414 (86.2) | 494 (87.6) | 532 (89.1) | 629 (86.5) | 718 (90.2) | 762 (91.6) | 0.028       | 50.87 (<0.001) |
| ≥80 years           | 71 (87.7)  | 109 (84.5) | 144 (86.2) | 162 (86.2) | 194 (89.4) | 213 (87.3) | 238 (90.8) | 291 (90.1) | 319 (89.9) | 427 (89.9) | 503 (92.3) | 556 (91.1) | <0.001      | 41.83 (<0.001) |
| <b>DM</b>           |            |            |            |            |            |            |            |            |            |            |            |            |             |                |
| Male                |            |            |            |            |            |            |            |            |            |            |            |            |             |                |
| 30–39 years         | 7 (22.6)   | 5 (11.1)   | 5 (9.4)    | 14 (19.7)  | 12 (19.7)  | 8 (12.9)   | 11 (19.3)  | 6 (12.5)   | 6 (14.6)   | 12 (24.0)  | 9 (16.1)   | 8 (12.9)   | 0.470       | 0.143 (0.596)  |
| 40–49 years         | 19 (21.1)  | 37 (28.0)  | 36 (23.2)  | 43 (26.9)  | 43 (27.7)  | 36 (24.0)  | 46 (26.0)  | 50 (29.4)  | 51 (31.1)  | 49 (26.3)  | 50 (24.4)  | 52 (26.8)  | 0.258       | 2.25 (<0.001)  |
| 50–59 years         | 45 (26.6)  | 66 (30.7)  | 85 (33.6)  | 91 (29.8)  | 92 (29.2)  | 117 (36.2) | 121 (34.9) | 121 (33.1) | 139 (36.3) | 167 (34.4) | 169 (32.9) | 188 (33.4) | 0.038       | 11.91 (<0.001) |
| 60–69 years         | 85 (29.0)  | 137 (35.5) | 157 (35.8) | 174 (36.1) | 167 (33.9) | 193 (37.6) | 221 (38.1) | 252 (41.0) | 264 (40.6) | 275 (40.1) | 272 (39.9) | 302 (40.2) | <0.001      | 18.05 (<0.001) |
| 70–79 years         | 50 (29.6)  | 74 (31.8)  | 111 (38.1) | 155 (42.6) | 148 (36.7) | 216 (43.3) | 232 (42.0) | 253 (43.3) | 282 (43.8) | 326 (41.9) | 393 (43.2) | 446 (44.3) | <0.001      | 33.91 (<0.001) |
| ≥80 years           | 13 (26.0)  | 18 (23.7)  | 33 (34.7)  | 46 (40.0)  | 41 (33.1)  | 58 (36.9)  | 83 (41.1)  | 84 (38.7)  | 107 (43.3) | 113 (39.6) | 131 (40.7) | 163 (44.5) | <0.001      | 12.89 (<0.001) |
| Female              |            |            |            |            |            |            |            |            |            |            |            |            |             |                |
| 30–39 years         | 0 (0.0)    | 4 (13.8)   | 5 (14.3)   | 2 (5.7)    | 3 (11.5)   | 6 (18.8)   | 5 (16.7)   | 2 (6.1)    | 5 (16.1)   | 1 (3.7)    | 5 (19.2)   | 3 (12.5)   | 0.192       | 0.163 (0.603)  |
| 40–49 years         | 12 (17.6)  | 12 (15.4)  | 5 (6.9)    | 15 (17.4)  | 15 (21.1)  | 15 (21.1)  | 18 (22.0)  | 26 (30.2)  | 18 (24.0)  | 19 (24.7)  | 19 (25.0)  | 21 (28.8)  | <0.001      | 1.09 (0.006)   |
| 50–59 years         | 30 (24.0)  | 56 (33.3)  | 52 (31.0)  | 48 (27.3)  | 53 (26.6)  | 53 (28.0)  | 47 (27.6)  | 62 (30.1)  | 60 (26.1)  | 52 (22.4)  | 70 (28.8)  | 74 (29.0)  | 0.261       | 2.42 (0.004)   |
| 60–69 years         | 78 (31.7)  | 104 (33.0) | 127 (36.0) | 124 (35.9) | 136 (39.5) | 156 (40.5) | 164 (39.0) | 174 (41.4) | 178 (41.8) | 155 (35.3) | 170 (37.8) | 181 (38.0) | 0.030       | 8.09 (<0.001)  |
| 70–79 years         | 62 (33.2)  | 110 (41.7) | 134 (40.9) | 171 (41.4) | 179 (43.9) | 199 (43.2) | 212 (44.2) | 259 (45.9) | 261 (43.7) | 305 (42.0) | 353 (44.3) | 390 (46.9) | 0.003       | 26.91 (<0.001) |
| ≥80 years           | 23 (28.4)  | 38 (29.5)  | 47 (28.1)  | 67 (35.6)  | 79 (36.4)  | 88 (36.1)  | 91 (34.7)  | 127 (39.3) | 147 (41.4) | 198 (41.7) | 212 (38.9) | 258 (42.3) | <0.001      | 20.12 (<0.001) |
| <b>IHD</b>          |            |            |            |            |            |            |            |            |            |            |            |            |             |                |
| Male                |            |            |            |            |            |            |            |            |            |            |            |            |             |                |
| 30–39 years         | 11 (35.5)  | 11 (24.4)  | 14 (26.4)  | 22 (31.0)  | 16 (26.2)  | 18 (29.0)  | 18 (31.6)  | 14 (29.2)  | 7 (17.1)   | 13 (26.0)  | 10 (17.9)  | 18 (29.0)  | 0.140       | −0.07 (0.855)  |
| 40–49 years         | 40 (44.4)  | 53 (40.2)  | 59 (38.1)  | 66 (41.2)  | 64 (41.3)  | 53 (35.3)  | 64 (36.2)  | 63 (37.1)  | 63 (38.4)  | 61 (32.8)  | 66 (32.2)  | 55 (28.4)  | <0.001      | 1.01 (0.114)   |
| 50–59 years         | 73 (43.2)  | 94 (43.7)  | 124 (49.0) | 125 (41.0) | 143 (45.4) | 137 (42.4) | 129 (37.2) | 143 (39.1) | 158 (41.3) | 161 (33.2) | 182 (35.5) | 175 (31.1) | <0.001      | 8.15 (<0.001)  |

|             |            |            |            |            |            |            |            |            |            |            |            |            |        |                |
|-------------|------------|------------|------------|------------|------------|------------|------------|------------|------------|------------|------------|------------|--------|----------------|
| 60–69 years | 149 (50.9) | 182 (47.2) | 189 (43.1) | 223 (46.3) | 219 (44.4) | 228 (44.4) | 245 (42.2) | 267 (43.5) | 270 (41.5) | 257 (37.5) | 249 (36.6) | 278 (37.0) | <0.001 | 10.12 (<0.001) |
| 70–79 years | 82 (48.5)  | 92 (39.5)  | 139 (47.8) | 186 (51.1) | 174 (43.2) | 249 (49.9) | 236 (42.7) | 269 (46.1) | 314 (48.8) | 348 (44.7) | 396 (43.6) | 434 (43.1) | 0.052  | 31.41 (<0.001) |
| ≥80 years   | 19 (38.0)  | 37 (48.7)  | 48 (50.5)  | 56 (48.7)  | 60 (48.4)  | 82 (52.2)  | 100 (49.5) | 109 (50.2) | 118 (47.8) | 114 (40.0) | 147 (45.7) | 144 (39.3) | 0.006  | 11.55 (<0.001) |
| Female      |            |            |            |            |            |            |            |            |            |            |            |            |        |                |
| 30–39 years | 4 (16.7)   | 3 (10.3)   | 9 (25.7)   | 8 (22.9)   | 2 (7.7)    | 5 (15.6)   | 4 (13.3)   | 5 (15.2)   | 6 (19.4)   | 4 (14.8)   | 2 (7.7)    | 2 (8.3)    | 0.110  | −0.24 (0.228)  |
| 40–49 years | 22 (32.4)  | 17 (21.8)  | 13 (18.1)  | 21 (24.4)  | 18 (25.4)  | 22 (31.0)  | 22 (26.8)  | 21 (24.4)  | 19 (25.3)  | 22 (28.6)  | 15 (19.7)  | 19 (26.0)  | 0.467  | 0.038 (0.887)  |
| 50–59 years | 58 (46.4)  | 72 (42.9)  | 59 (35.1)  | 68 (38.6)  | 69 (34.7)  | 63 (33.3)  | 47 (27.6)  | 74 (35.9)  | 65 (28.3)  | 65 (28.0)  | 57 (23.5)  | 75 (29.4)  | <0.001 | 0.273 (0.708)  |
| 60–69 years | 125 (50.8) | 145 (46.0) | 158 (44.8) | 151 (43.8) | 152 (44.2) | 162 (42.1) | 195 (46.3) | 173 (41.2) | 187 (43.9) | 163 (37.1) | 175 (38.9) | 160 (33.6) | <0.001 | 3.38 (0.023)   |
| 70–79 years | 99 (52.9)  | 142 (53.8) | 160 (48.8) | 206 (49.9) | 195 (47.8) | 218 (47.3) | 206 (42.9) | 258 (45.7) | 261 (43.7) | 291 (40.0) | 338 (42.5) | 338 (40.6) | <0.001 | 20.15 (<0.001) |
| ≥80 years   | 38 (46.9)  | 74 (57.4)  | 90 (53.9)  | 92 (48.9)  | 98 (45.2)  | 128 (52.5) | 108 (41.2) | 146 (45.2) | 165 (46.5) | 202 (42.5) | 220 (40.4) | 255 (41.8) | <0.001 | 17.39 (<0.001) |

Data reported as n(%)

AF, atrial fibrillation; DM, diabetes mellitus; IHD, ischemic heart disease.

*P* for trend obtained by Cochran-Armitage trend test;  $\beta$  (*P*-value) obtained by linear regression analysis.
